# Supplementary material for: Organophotocatalysis system of p/n bilayers for wide visible-light-induced molecular hydrogen evolution
Source: Royal Society of Chemistry journal article supplement (doi:10.1039/c2ra21281a), 2012-01-01
Supplement: c2ra21281a.pdf [file c2ra21281a.pdf]

## Electronic Supplementary Information

### Organophotocatalysis system of p/n bilayers for wide visible-light-induced molecular hydrogen evolution

Toshiyuki Abe,<sup>\*a</sup> Junpei Chiba,<sup>a</sup> Misaki Ishidoya<sup>a</sup> and Keiji Nagai<sup>b</sup>

*a: Department of Frontier Materials Chemistry, Graduate School of Science and Technology, Hirosaki University, 3 Bunkyo-cho, Hirosaki 036-8561, JAPAN*

*b: Chemical Resources Laboratory, Tokyo Institute of Technology, Suzukake-dai, Midori-ku, Yokohama 226-8503, JAPAN*

\* Correspondence to be addressed

#### Absorption spectra of $H_2Pc/C_{60}$ and PTCBI/ $H_2Pc$ bilayers

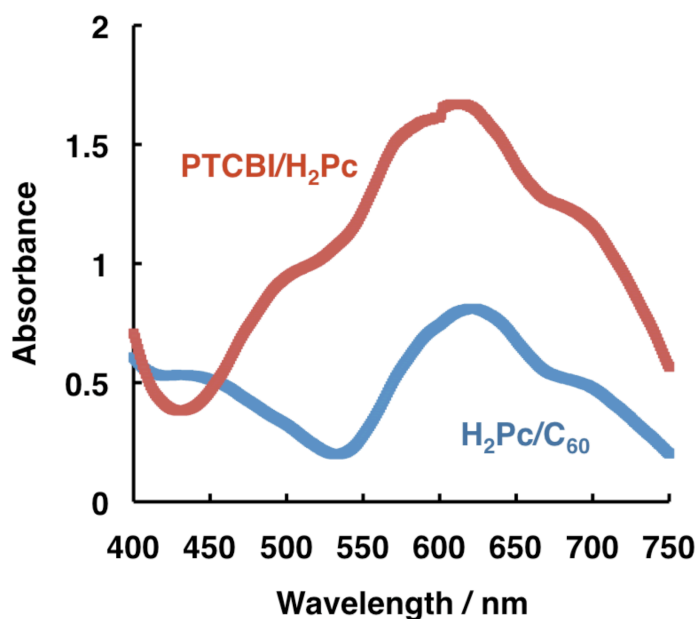

**Fig. S1** Absorption spectra of  $H_2Pc/C_{60}$  and PTCBI/ $H_2Pc$  bilayers. Film thickness of  $H_2Pc/C_{60}$ ,  $H_2Pc$  = 75 nm and  $C_{60}$  = 125 nm. Film thickness of PTCBI/ $H_2Pc$ , PTCBI = 300 nm and  $H_2Pc$  = 60 nm.

**Table S1** Comparison of photoenergy conversion efficiency ( $\eta$ ) and EQE for other visible-light photocatalysts with those values for the present system. For reference, the efficiencies for the photovoltaic cells of C<sub>60</sub>/H<sub>2</sub>Pc are also listed.

| System                                                                                                                       | $\eta$ / % | EQE / % <sup>a</sup>         | Reference |
|------------------------------------------------------------------------------------------------------------------------------|------------|------------------------------|-----------|
| <b>Organic photovoltaic cell</b>                                                                                             |            |                              |           |
| C <sub>60</sub> /H <sub>2</sub> Pc                                                                                           | 0.03       | 1.0 (600 nm)                 | 1         |
| C <sub>60</sub> /H <sub>2</sub> Pc                                                                                           | 0.25       | ----                         | 2         |
| C <sub>60</sub> /H <sub>2</sub> Pc including co-evaporant                                                                    | 2.5        | ----                         | 2         |
| p-i-n-structured C <sub>60</sub> /H <sub>2</sub> Pc <sup>b</sup>                                                             | 2.5        | 65 (650 nm)                  | 3         |
| <b>Photocatalyst for H<sub>2</sub> evolution</b>                                                                             |            |                              |           |
| (co-catalyst)                                                                                                                |            |                              |           |
| TiO <sub>2</sub> <sup>c</sup>                                                                                                | 0.4        | ----                         | 4         |
| SrTiO <sub>3</sub> :Rh (Ru) <sup>d</sup>                                                                                     | 0.12       | 1.7 (420 nm)<br>0.2 (500 nm) | 5         |
| dye-modified KTa(Zr)O <sub>3</sub> (Pt)                                                                                      | 0.013      | ----                         | 6         |
| In <sub>0.9</sub> Ni <sub>0.1</sub> TaO <sub>4</sub> (NiO <sub>y</sub> )                                                     | ----       | 0.66 (402 nm)                | 7         |
| (CuAg) <sub>0.15</sub> In <sub>0.3</sub> Zn <sub>1.4</sub> S <sub>2</sub> (Ru)                                               | ----       | 7.4 (520 nm)                 | 8         |
|                                                                                                                              |            | 1.0 (600 nm)                 |           |
| TaON (Pt) <sup>e</sup>                                                                                                       | ----       | 0.4 (420 nm)                 | 9         |
| [(Ga <sub>1-x</sub> Zn <sub>x</sub> )(N <sub>1-x</sub> O <sub>x</sub> )] (Rh <sub>2-y</sub> Cr <sub>y</sub> O <sub>3</sub> ) | ----       | 5.9 (420-440 nm)             | 10        |
| CdS (Pt-PdS)                                                                                                                 | ----       | 93 (420 nm)                  | 11        |
| g-C <sub>3</sub> N <sub>4</sub> (Pt)                                                                                         | ----       | 0.1 (420-460 nm)             | 12        |
| ZrO <sub>2</sub> /TaON (Pt) <sup>e</sup>                                                                                     | ----       | 6.3 (420.5 nm)               | 13        |
| CuGa <sub>2</sub> In <sub>3</sub> S <sub>8</sub> (Rh)                                                                        | ----       | 15 (560 nm)                  | 14        |
|                                                                                                                              |            | 12 (600 nm)                  |           |
|                                                                                                                              |            | 5 (640 nm)                   |           |
| ZnIn <sub>2</sub> S <sub>4</sub> (Pt)                                                                                        | ----       | 34 (420 nm)                  | 15        |
|                                                                                                                              |            | 24 (550 nm)                  |           |
| A wired PEC cell of a commercial triple-junction amorphous silicon photoanode <sup>f</sup>                                   | 4.7        | ----                         | 16        |
| A wireless cell of a commercial triple-junction amorphous silicon (NiMoZn)                                                   | 2.5        | ----                         | 16        |
| H <sub>2</sub> Pc/C <sub>60</sub> (Pt)                                                                                       | ----       | 4.0 (600 nm)<br>1.2 (700 nm) | this work |

<sup>a</sup> The value in the parenthesis represents the wavelength employed for measuring EQE.

<sup>b</sup> The term “i” indicates a co-deposition layer of C<sub>60</sub> and H<sub>2</sub>Pc. The EQE value was estimated from the reported internal quantum efficiency and the absorption ratio of the film employed.

<sup>c</sup> A typical UV-responsive photocatalyst.

<sup>d</sup> In the Z-scheme photocatalysis system, the photocatalyst was concurrently used in combination with BiVO<sub>4</sub> photocatalyst for O<sub>2</sub> evolution.

<sup>e</sup> In the Z-scheme photocatalysis system, the photocatalyst was used in combination with Pt-loaded WO<sub>3</sub> photocatalyst for O<sub>2</sub> evolution in the presence of IO<sub>3</sub><sup>-</sup>/I<sup>-</sup>.

<sup>f</sup> H<sub>2</sub> occurred at a counter electrode of NiMoZn loaded on Ni mesh.

## References

- [1] K. Murata, S. Ito, K. Takahashi and B. M. Hoffman, *Appl. Phys. Lett.*, 1996, **68**, 427.
- [2] T. Kaji, M. Zhang, S. Nakao, K. Iketani, K. Yokoyama C. W. Tang and M. Hiramoto, *Adv. Mater.*, 2011, **23**, 3320.
- [3] K. Suemori, T. Miyata, M. Yokoyama and M. Hiramoto, *Appl. Phys. Lett.*, 2005, **86**, 063509.
- [4] A. Fujishima, K. Kohayakawa and K. Honda, *J. Electrochem. Soc.*, 1975, **122**, 1487.
- [5] Y. Sasaki, H. Nemoto, K. Saito and A. Kudo, *J. Phys. Chem. C*, 2009, **113**, 17536.
- [6] H. Hagiwara, T. Inoue, K. Kaneko and T. Ishihara, *Chem. Eur. J.*, 2009, **15**, 12862.
- [7] Z. Zou, J. Ye, K. Sayama and H. Arakawa, *Nature*, 2002, **414**, 625.
- [8] I. Tsuji, H. Kato and A. Kudo, *Ang. Chem. Int. Ed.*, 2005, **44**, 3565.
- [9] R. Abe, T. Takata, H. Sugihara and K. Domen, *Chem. Commun.*, 2005, 3829.
- [10] K. Maeda, K. Teramura, D. Li, T. Takata, N. Saito, Y. Inoue and K. Domen, *Nature*, 2006, **440**, 295; K. Maeda, K. Teramura and K. Domen, *J. Catal.*, 2008, **254**, 198.
- [11] H. Yan, J. Yang, G. Ma, G. Wu, X. Zong, Z. Lei, J. Shi and C. Li, *J. Catal.*, 2009, **266**, 165.
- [12] X. Wang, K. Maeda, A. Thomas, K. Takanabe, G. Xin, J. M. Carlsson, K. Domen and M. Antonietti, *Nat. Mater.*, 2009, **8**, 76.
- [13] K. Maeda, M. Higashi, D. Li, R. Abe and K. Domen, *J. Am. Chem. Soc.*, 2010, **132**, 5858.
- [14] H. Kaga, K. Saito and A. Kudo, *Chem. Commun.*, 2010, **46**, 3779.
- [15] B. Chai, T. Peng, P. Zeng, X. Zhang and X. Li, *J. Phys. Chem. C*, 2011, **115**, 6149.
- [16] S. Y. Reece, J. A. Hamel, K. Sung, T. D. Jarvi, A. J. Esswein, J. J. H. Pijpers, D. G. Nocera, *Science*, 2011, **334**, 645.
